# Supplementary material for: Continued Participation of Israeli Adolescents in Online Sports Programs during the COVID-19 Pandemic Is Associated with Higher Resilience
Source: MDPI journal article supplement (doi:10.3390/ijerph18084386), 2021-04-20
Supplement: s1 [file s1]

## Appendix 1 – Well-being during the Covid-19 pandemic among adolescents - Digital survey

### Participation in educational and physical activities

1. Do you participate in any kind of organized sports program?
  - A. Yes
  - B. No
  
2. If you do, what kind of physical activities do you engage in?
  - A. Competitive sports
  - B. Dance
  - C. Hamesh Ezbaot Organization
  - D. Martial arts
  - E. Gym
  - F. Other \_\_\_\_\_
  - G. I do not participate in any kind of physical activities
  
3. Has your sports group or organization remained active during the current pandemic crisis?
  - A. Yes
  - B. No
  
4. How long has it been since you joined your sports group or organization?
  - A. Month to three months
  - B. Four to six months
  - C. Six to twelve months
  - D. More than a year
  - E. I am not a member of any kind of sports group or organization
  
5. Are you a member of any kind of youth movement?
  - A. Yes
  - B. No
  
6. If you are a member, which of the following youth movements do you belong to?
  - A. HaTzofim (Hebrew Scouts)
  - B. Knafaim shel Krembo (Krembo Wings, a Youth Movement for Children with and without Disabilities)
  - C. HaNoar HaOved (Federation of Young Students and Workers)
  - D. HaShomer haTzair (The Young Guard)
  - E. Bney haMoshavim
  - F. Bney Akiva
  - G. Other \_\_\_\_\_
  - H. I am not a member of any kind of youth movement

7. How long has it been since you joined your youth movement?
  - A. Month to three months
  - B. Four to six months
  - C. Six to twelve months
  - D. More than a year
  - E. I am not a member of any kind of youth movement

The following questions have to do with your sports group or organization

8. Where do the activities take place? \_\_\_\_\_
9. How often do you participate in the regular meetings of your group or organization?
  - A. I rarely participate
  - B. I participate irregularly
  - C. I usually participate
  - D. I always participate
10. On average, how many times a month do you exercise?  
\_\_\_\_\_
11. What is the main reason why you participate in the activities?
  - A. To improve my fitness levels
  - B. To prepare for my army service
  - C. To improve my self-confidence
  - D. To get together with friends
  - E. To gain leadership and excellence skills
  - F. To improve my health
  - G. To learn and grow
  - H. To help others
  - I. Other

Grade how important to you are the following factors in the group or organization that you exercise with:

|                                  | 1                    | 2                  | 3                  | 4                    | 5              |
|----------------------------------|----------------------|--------------------|--------------------|----------------------|----------------|
|                                  | Not at all important | Slightly important | Somewhat Important | Moderately important | Very important |
| 12. content of physical exercise |                      |                    |                    |                      |                |

|                                                |  |  |  |  |  |
|------------------------------------------------|--|--|--|--|--|
| 13. session initiation and closure discussions |  |  |  |  |  |
| 14. relationship with the instructor or guide  |  |  |  |  |  |
| 15. relationships with friends in the group    |  |  |  |  |  |
| 16. program special events                     |  |  |  |  |  |

17. If any other significant factors came to your mind, please share: \_\_\_\_\_

18. How would you define yourself when it comes to exercise. How much do you like to exercise:

- A. Not at all
- B. Slightly
- C. Moderate
- D. To a large extent
- E. To a very large extent

19. In general, how many times do you usually engage in strenuous exercise in your free time?

- A. Every day
- B. 4-6 times a week
- C. 2-3 times a week
- D. Once a week
- E. Once a month
- F. Less than once a month
- G. Never

20. During the last 7 days, in how many days did you exercise that lasted a total of at least 60 minutes a day?

- A. 0 days
- B. One day
- C. Two days
- D. 3 days
- E. 4 days

F. 5 days

G. 6 days

H. 7 days
